# Supplementary material for: Metformin suppresses the growth of colorectal cancer by targeting INHBA to inhibit TGF-β/PI3K/AKT signaling transduction
Source: PubMed Central journal article supplement (PMC8891354; doi:10.1038/s41419-022-04649-4), 2022-03-02
Supplement: 41419_2022_4649_MOESM1_ESM.pdf [file 41419_2022_4649_MOESM1_ESM.pdf]

**Figure S1**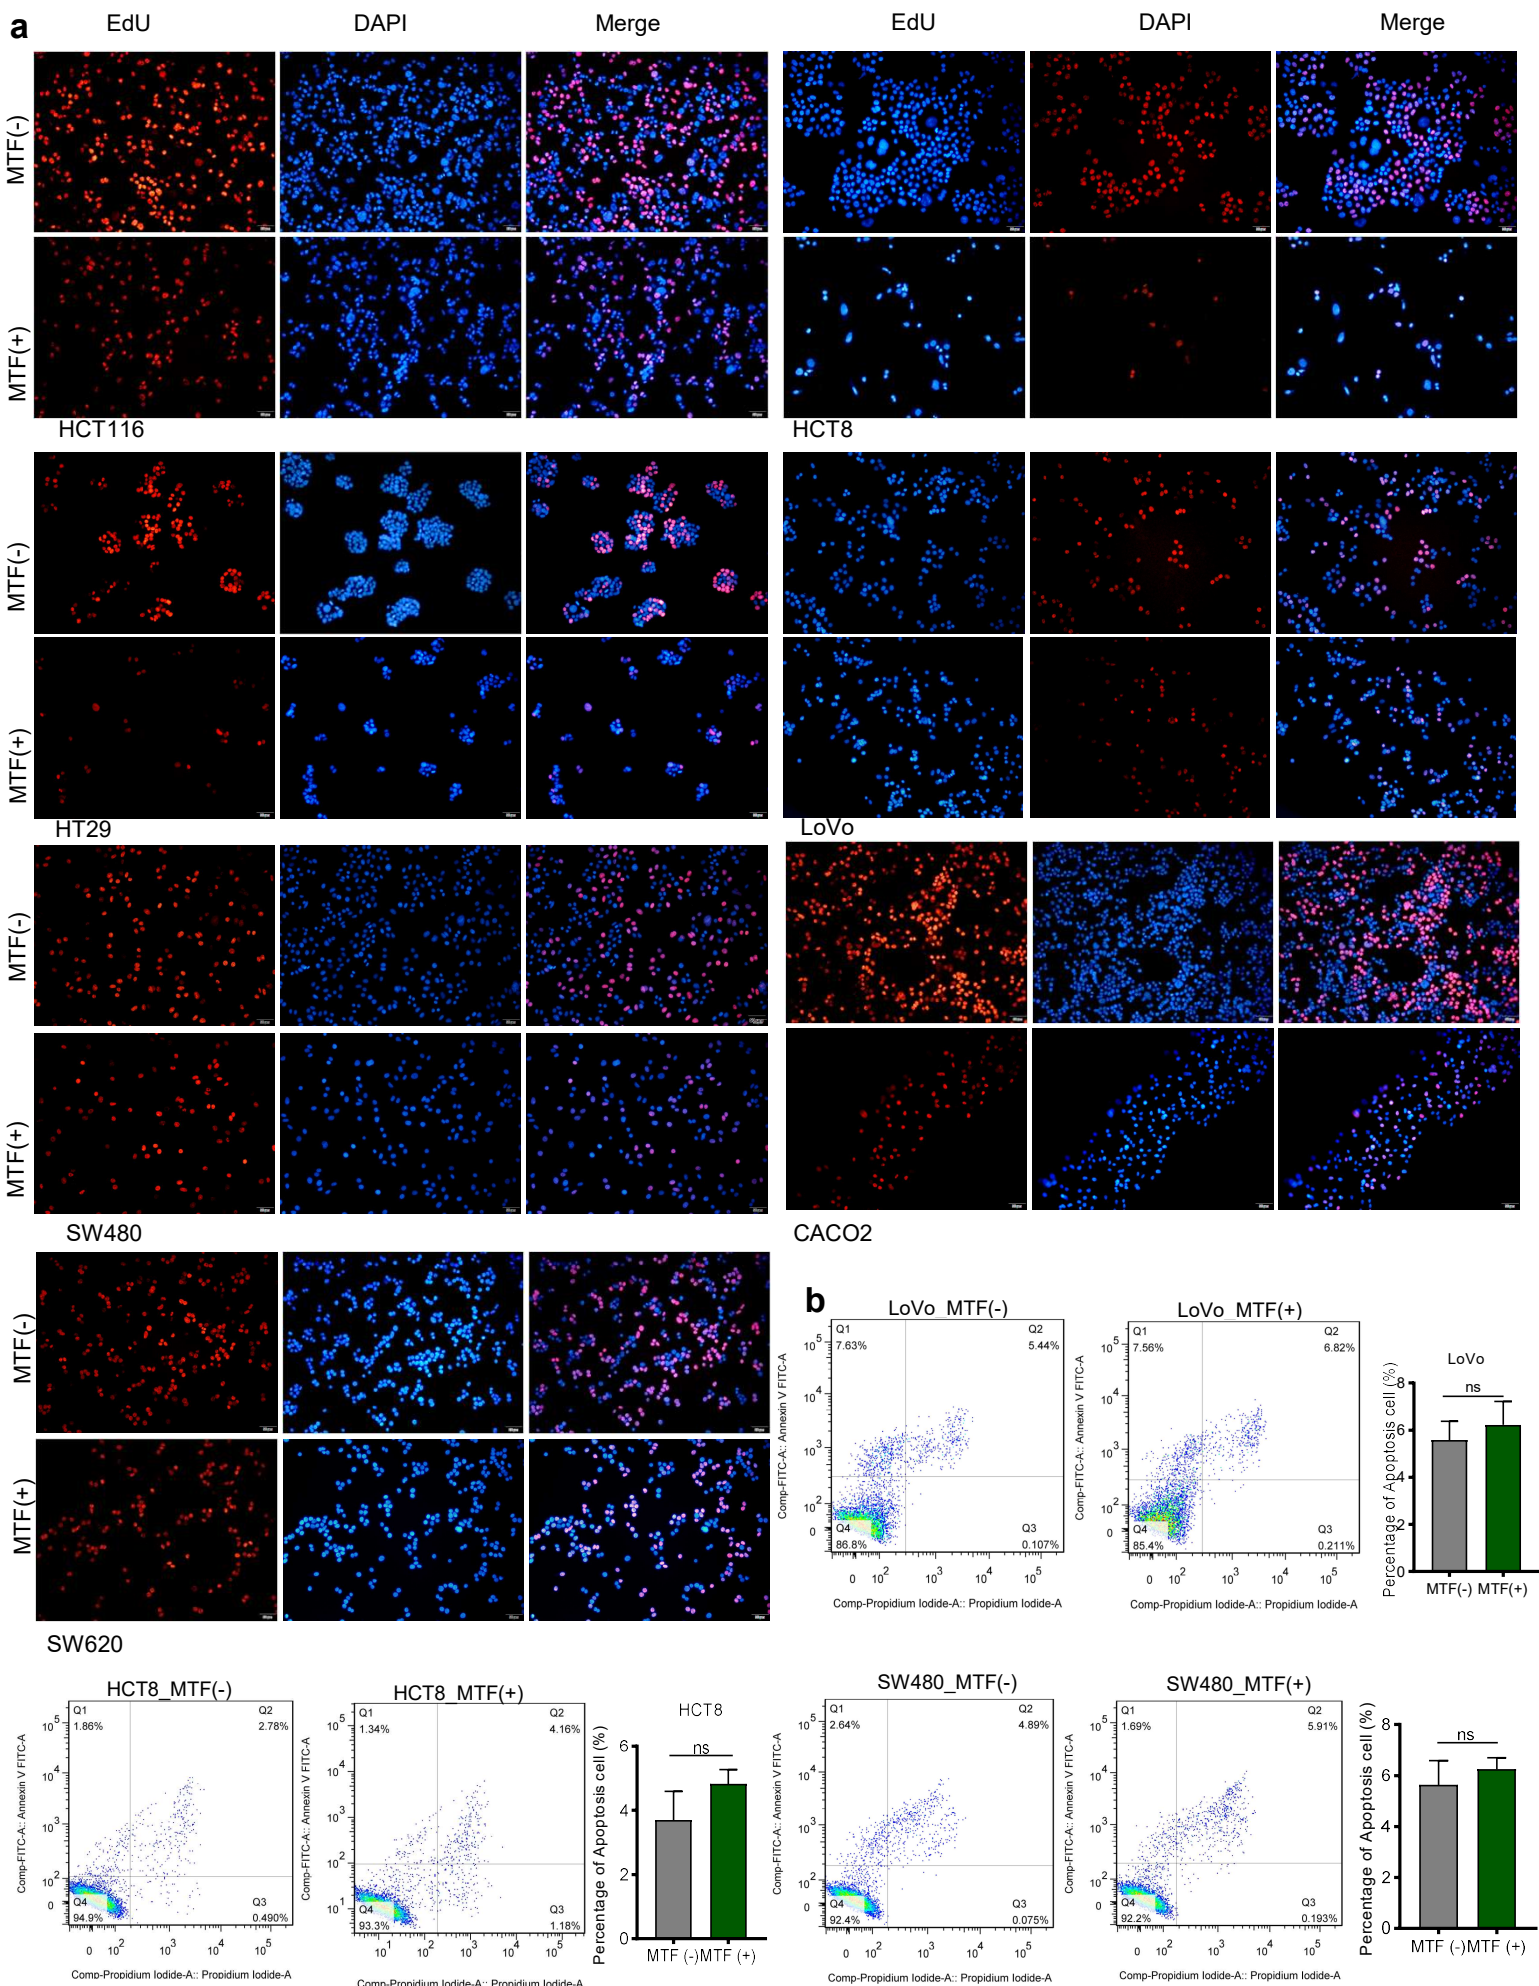

**Figure S1 metformin suppressed proliferation of CRC cells. (a)** Representative images of EdU staining in 7 CRC cell lines with or without metformin treatment. Magnification: 200 $\times$ . Scale bar: 50  $\mu$ m. **(b)** Flow cytometry showing the effect of low dose (10mM) metformin on cell apoptosis

## Figure S2

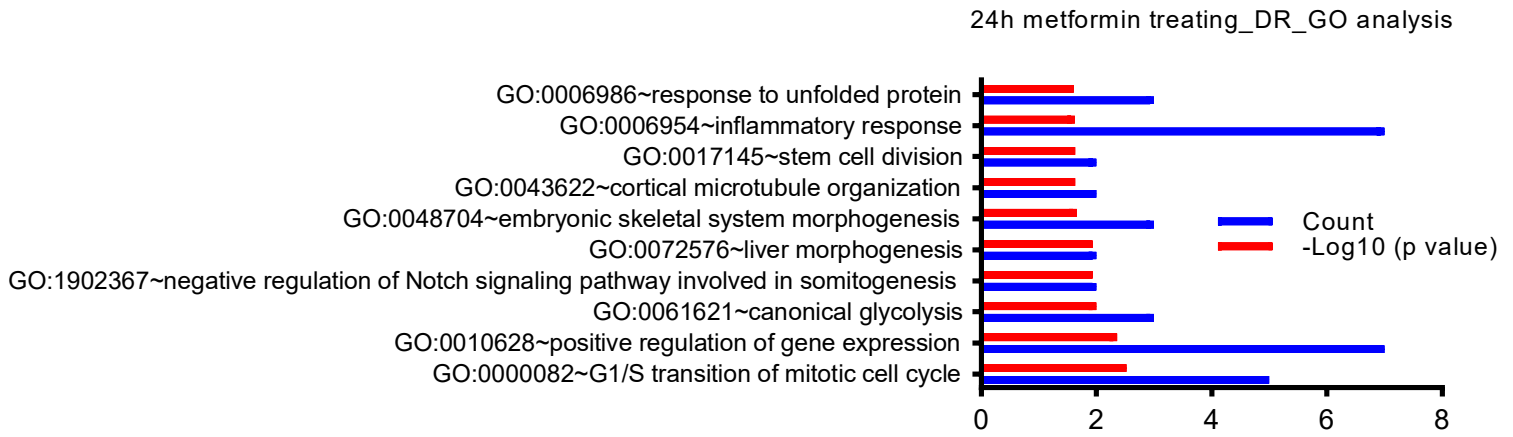

**Figure S2 Metformin inhibited G1/S transduction in LoVo cells.** GO analyzing the genes downregulated after metformin treating for 24 hours in GSE67342.

## Figure S3

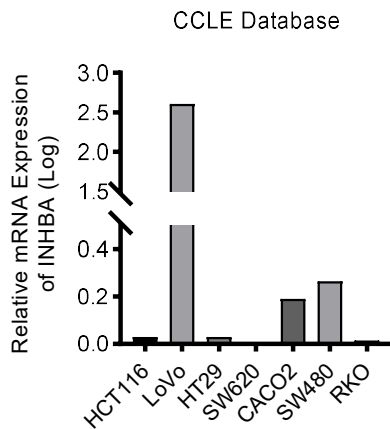

**Figure S3 mRNA expression of INHBA in CRC cell lines.** Quantitative PCR analysis of INHBA expressing in CRC cell lines. Data from Cancer Cell Line Encyclopedia (CCLE) database.

## Figure S4

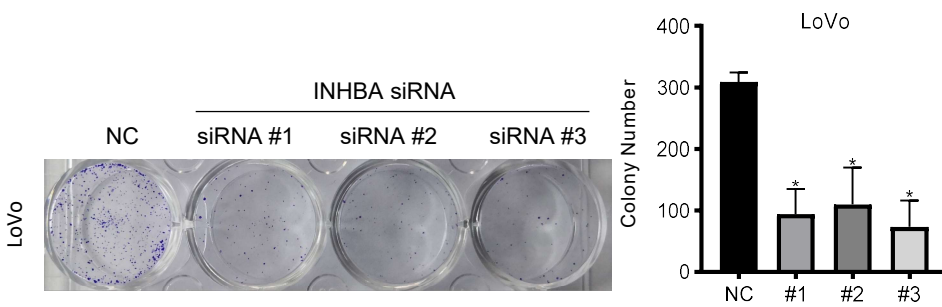

**Figure S4 Knocking down INHBA reduced the viability of CRC cells.** Colony formation assay showing silencing INHBA inhibited the growth of LoVo cells.

**Figure S5**

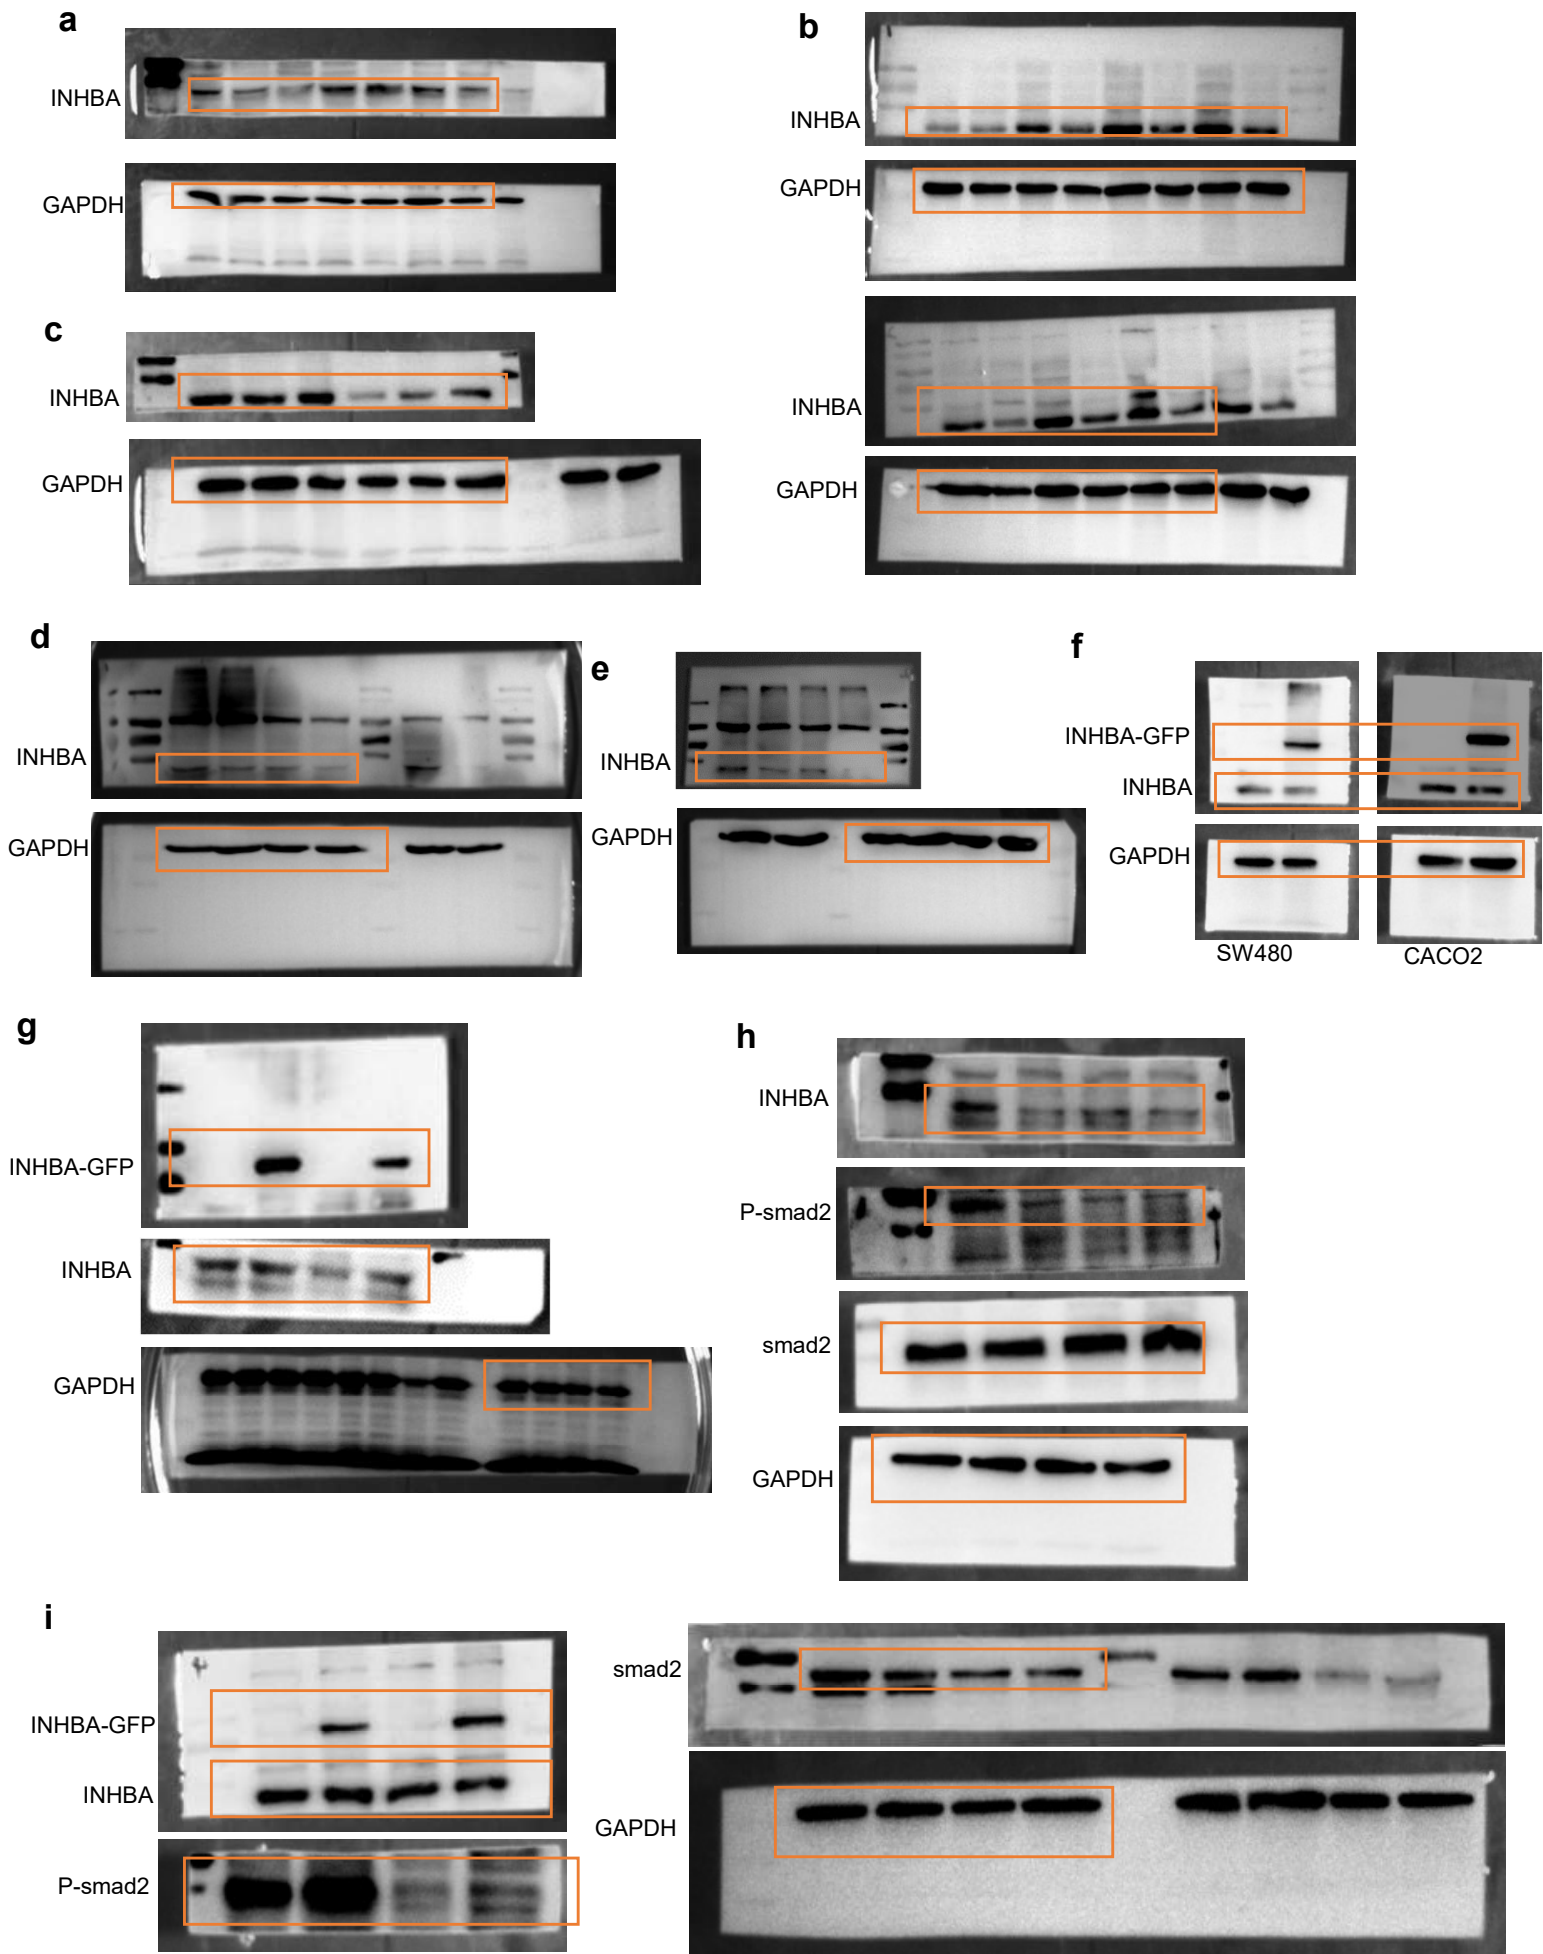

**j**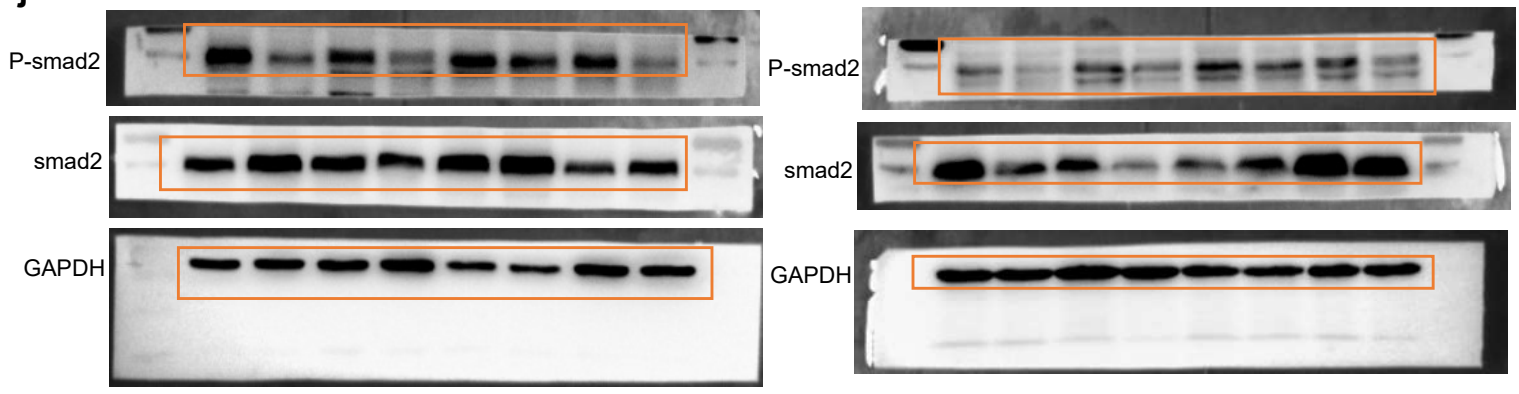**k**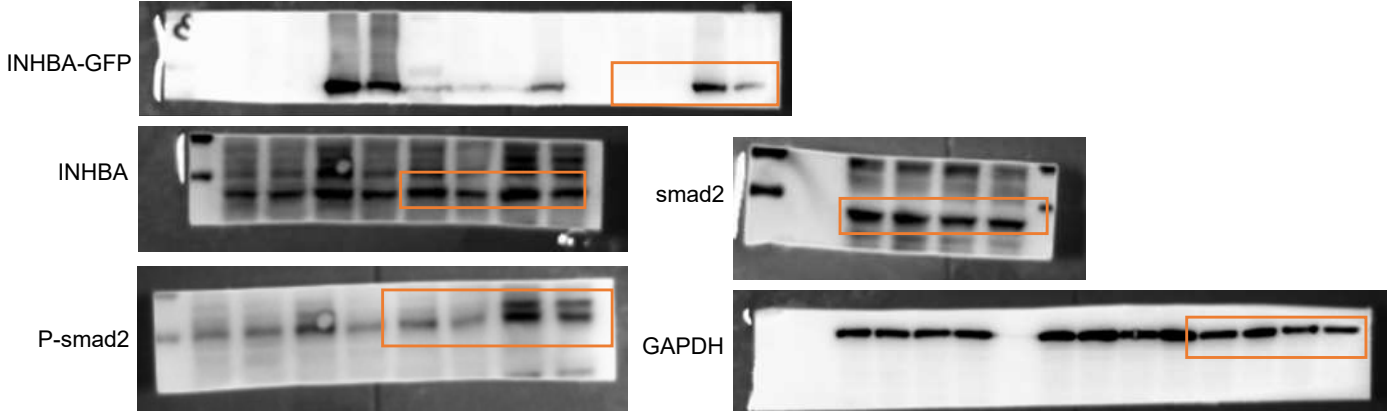**l**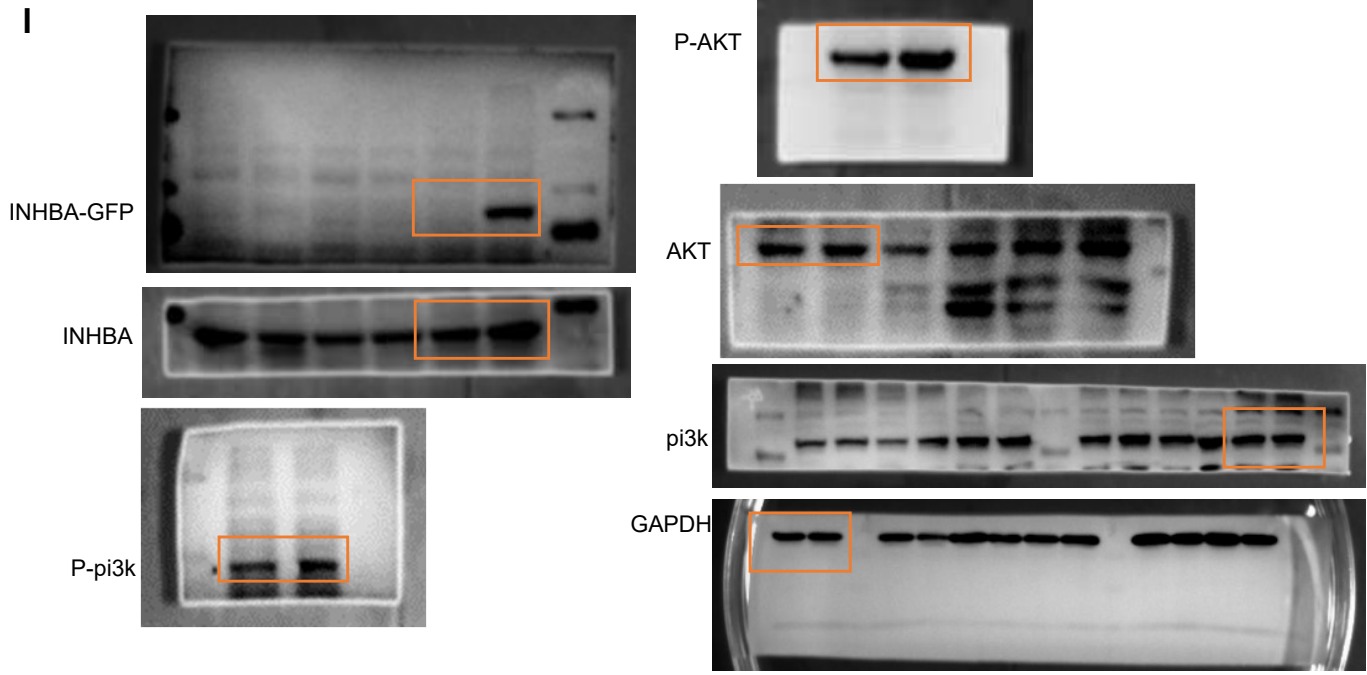**m**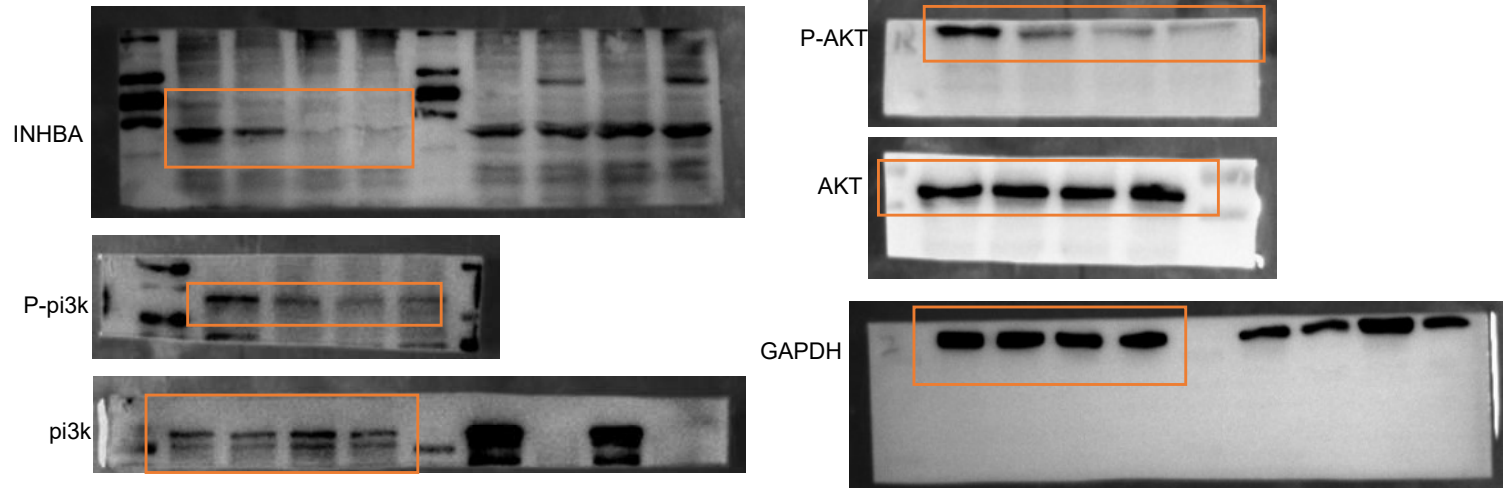

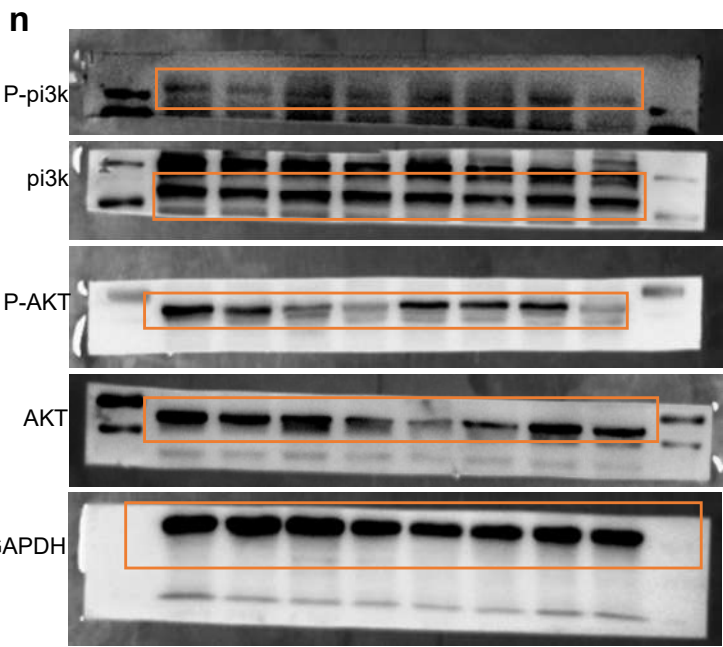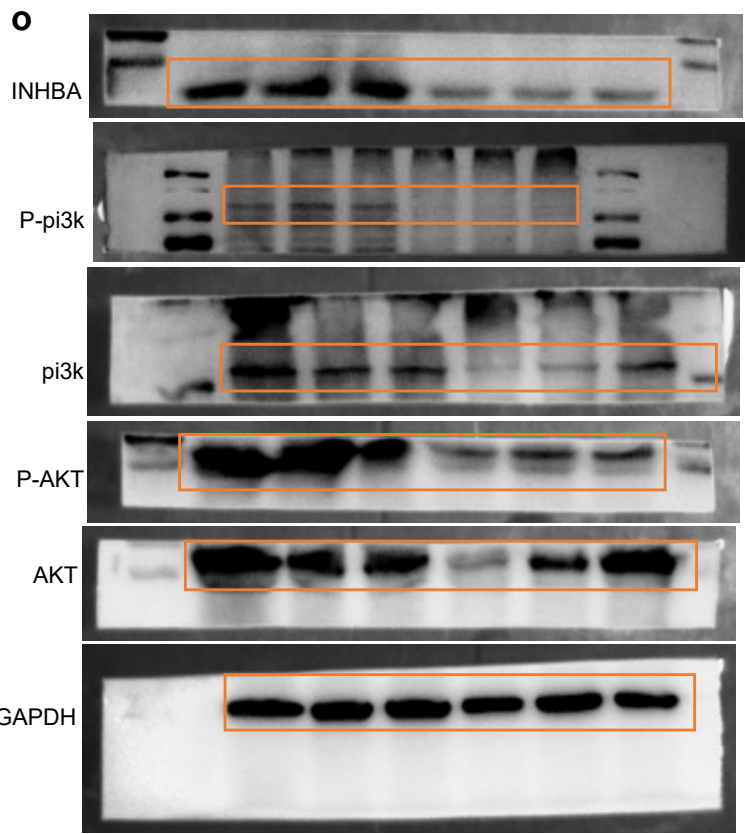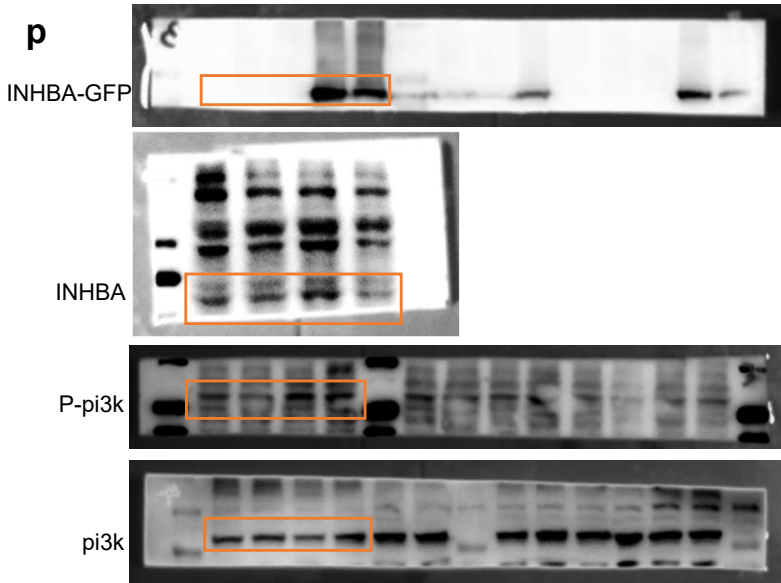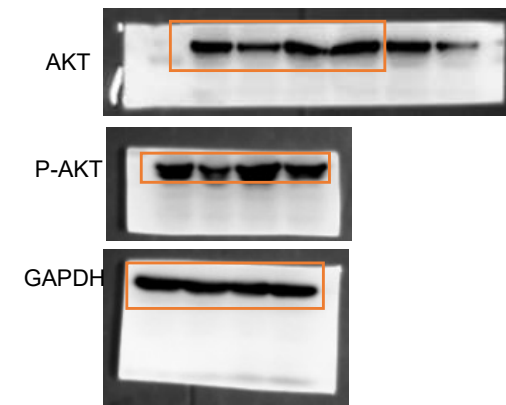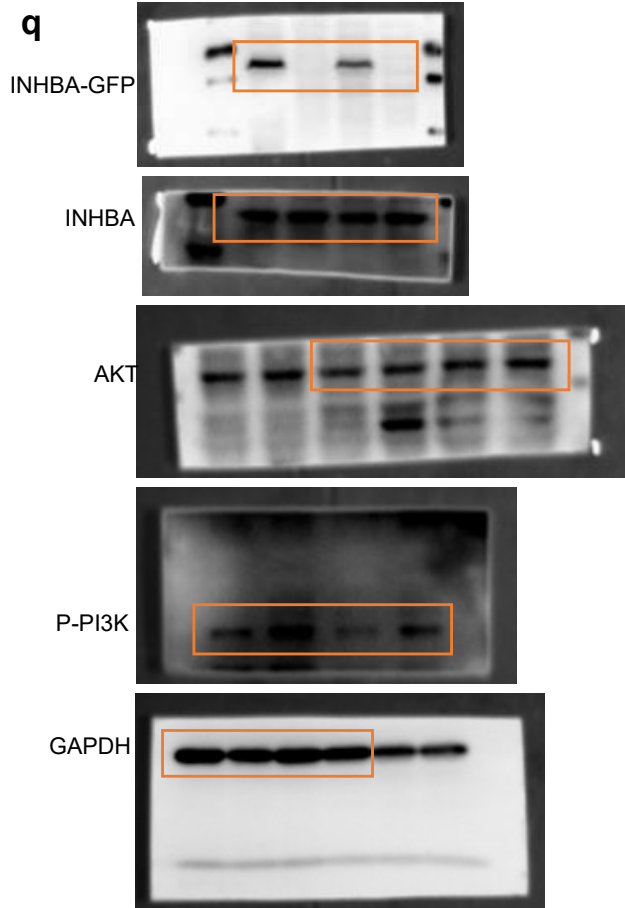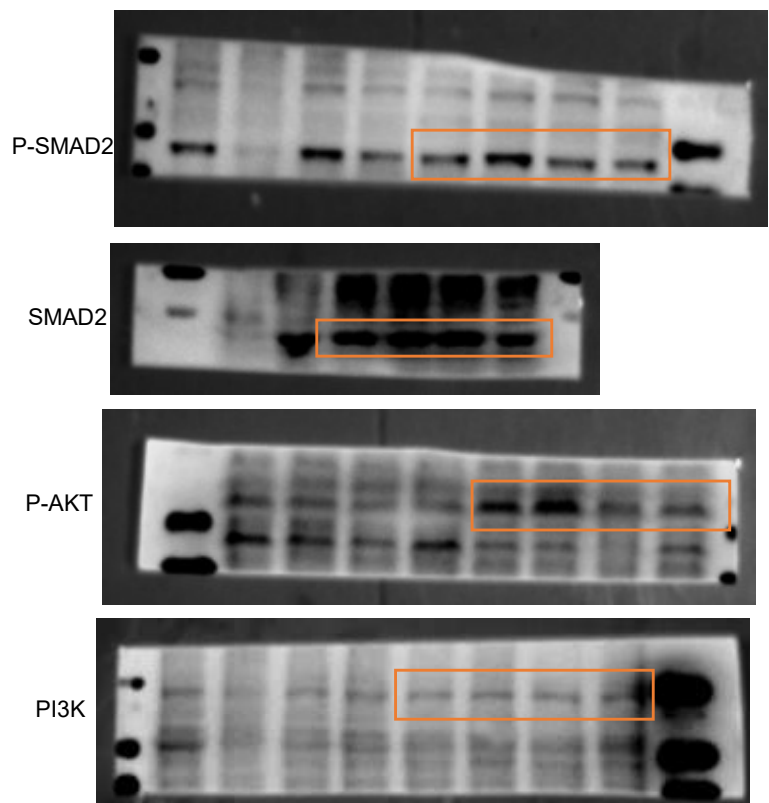

**r**

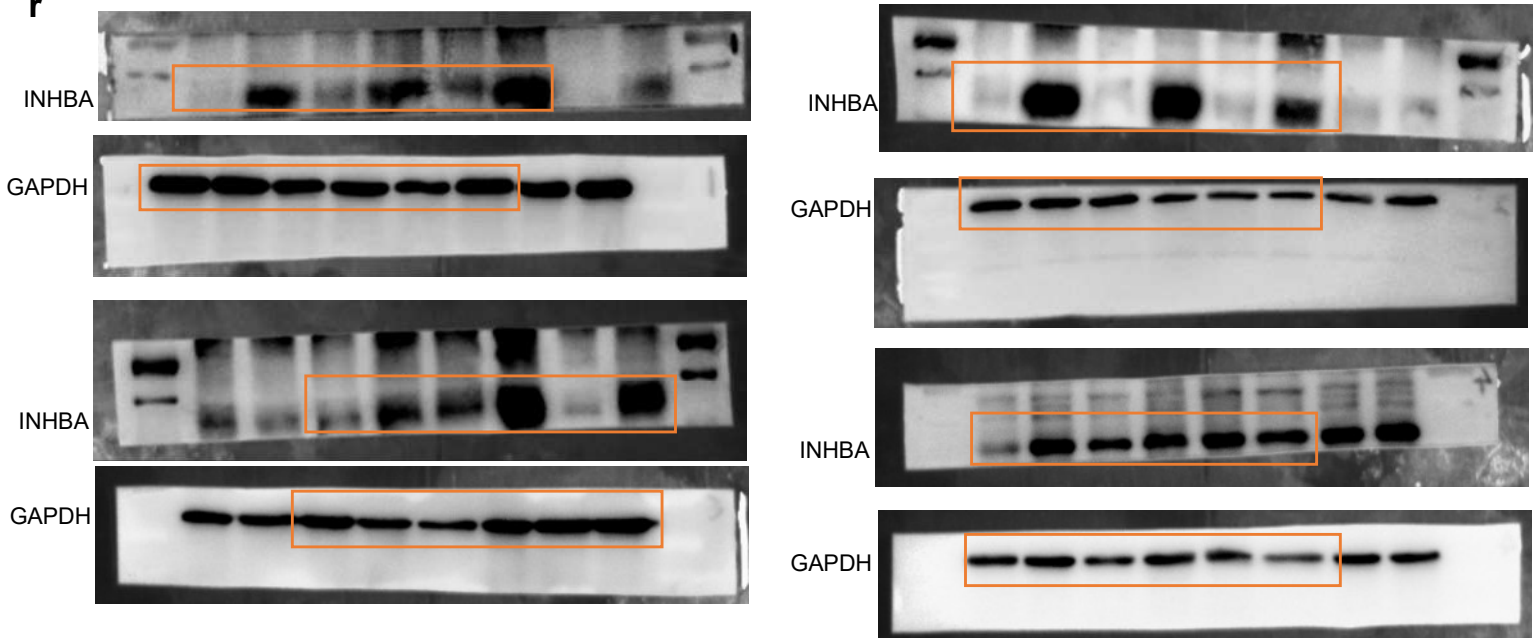

**Figure S5 Original images of western blot (a-c)** Original data of figure 3b,3d, and 3g 4f.(**d-e**) Original data of figure 4b, 4f. (**f-g**) Original data of figure 5a, 5g. (**h-k**) Original data of figure 6d-6g. (**l-q**) Original data of figure 7c-7h. (**r**) Original data of figure 8b.

**Table S1 qPCR primers sequences**

---

| <b>Gene</b>        | <b>Primer sequence</b> |
|--------------------|------------------------|
| <b>INHBA-QF</b>    | GGCAAGTTGCTGGATTATAGTG |
| <b>INHBA-QR</b>    | CTGAGAGTTGGGTACATCCTTT |
| <b>CyclinD1-QF</b> | GTCCTACTTCAAATGTGTGCAG |
| <b>CyclinD1-QR</b> | GGGATGGTCTCCTTCATCTTAG |
| <b>EGF-QF</b>      | GAAGCATTGGACAAGTATGCAT |
| <b>EGF-QR</b>      | CAGCTTCTGAGTCCTGTAGTAG |

---
